# Supplementary material for: Robust and durable Li-ion batteries fabricated using lead-free crystalline M2NiMnO6 (where M = Eu, Gd, and Tb) double perovskites
Source: Royal Society of Chemistry journal article supplement (doi:10.1039/d4ce00711e), 2024-01-01
Supplement: d4ce00711e1.pdf [file d4ce00711e1.pdf]

## Supporting Information

# Robust and durable Li-ion batteries fabricated by using lead-free crystalline $M_2NiMnO_6$ (where $M = \text{Eu, Gd, Tb}$ ) double perovskites

Kiran P. Shinde,<sup>a</sup> Harish S. Chavan,<sup>b</sup> Sarfraz H. Mujawar,<sup>c</sup> Amol S. Salunke<sup>d</sup>, Abu Talha Aqueel  
Ahmed,<sup>d</sup> Nabeen K. Shrestha<sup>d</sup>, Joon Sik Park,<sup>a</sup> Hyunsik Im,<sup>d</sup> Akbar I. Inamdar,<sup>\* d</sup>

<sup>a</sup> Department of Materials Science and Engineering, Hanbat National University, Daejeon 34158,  
South Korea.

<sup>b</sup> Department of Chemistry and Chemical Engineering, Inha University, 100 inha-ro, Michuhol-  
gu, 22212 Incheon, South Korea

<sup>c</sup> Department of Physics, Yashwantrao Chavan Institute of Science Satara, (Autonomous),  
Maharashtra, India, 415001.

<sup>d</sup> Division of Physics and Semiconductor Science, Dongguk University, Seoul 04620, Republic of  
Korea

\*Corresponding author

**E-mail:** akbarphysics2002@gmail.com,

**Keywords:** Li-ion battery; anode electrode; double perovskite; electrochemical properties, energy  
storage

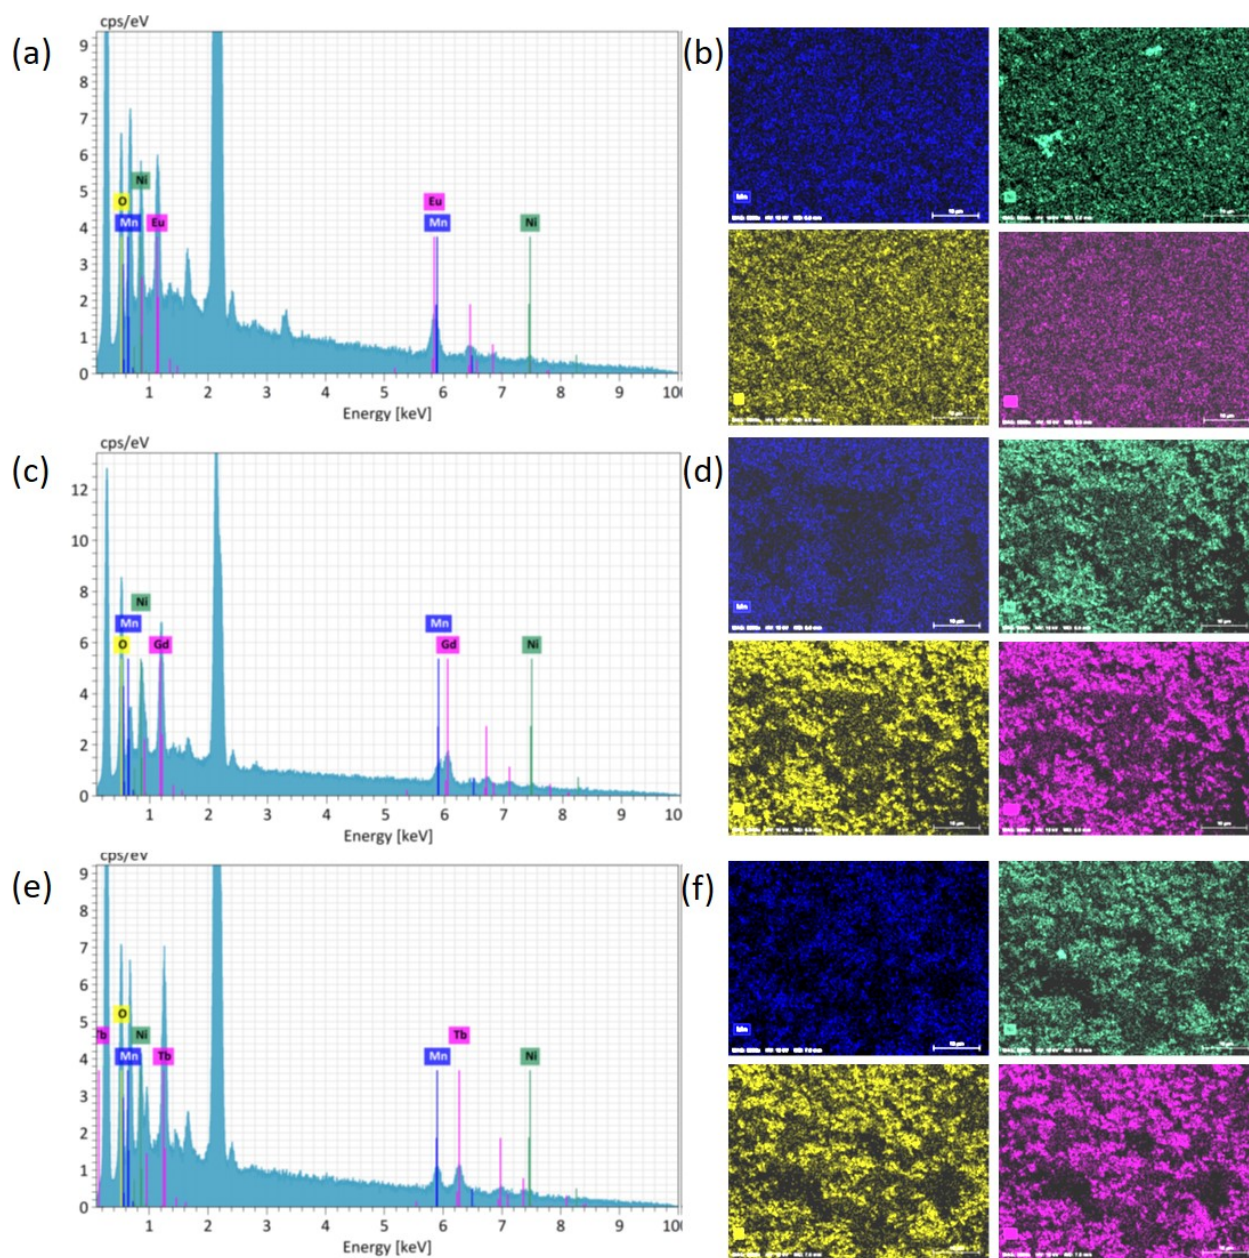

**Figure S1.** EDAX and elemental mapping analysis of the double perovskite  $M_2NiMnO_6$  (where  $M=Eu, Gd, Tb$ ) anode electrodes, **(a, b)**  $Eu_2NiMnO_6$  **(c, d)**  $Gd_2NiMnO_6$  **(e, f)**  $Tb_2NiMnO_6$ .

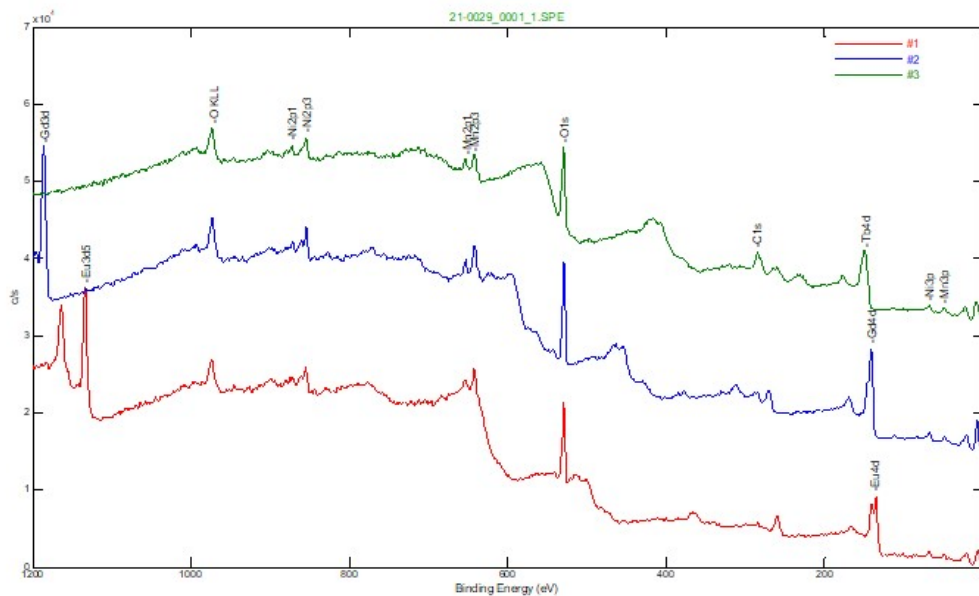

**Figure S2.** X-ray photo electron spectroscopy (XPS) survey spectra of the double perovskite  $M_2NiMnO_6$  (where  $M= Eu, Gd, Tb$ ), revealing the presence of the all the desired elements.

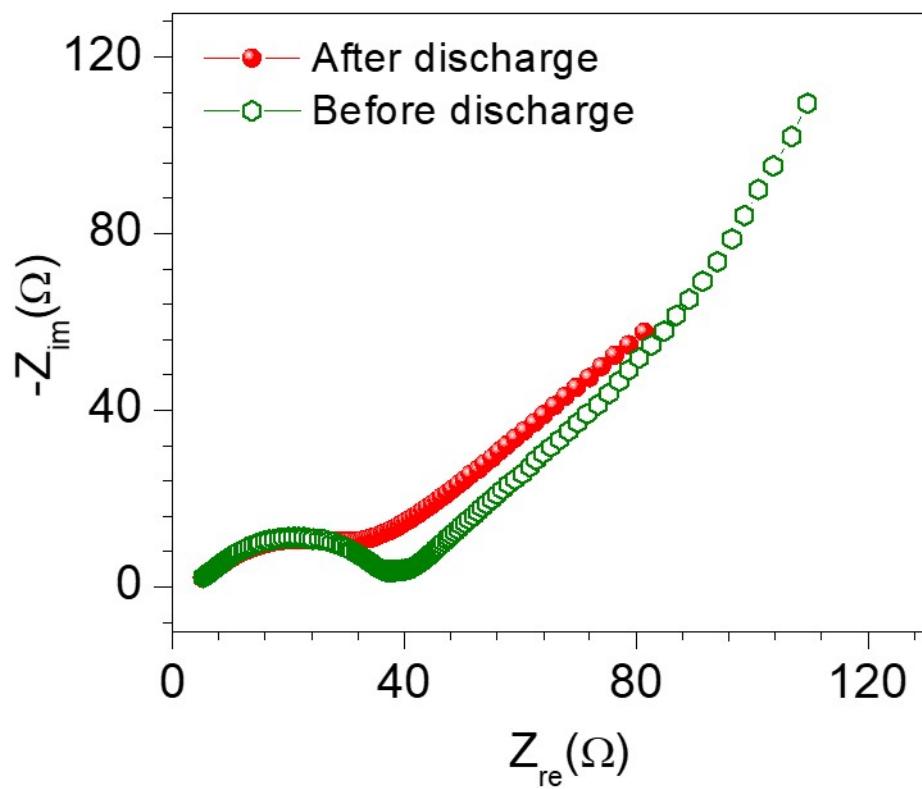

**Figure S3.** Nyquist plots of the  $Tb_2NiMnO_6$  anode electrode before and after lithiation process, suggesting the significant reduction of the charge transfer resistance upon lithiation.

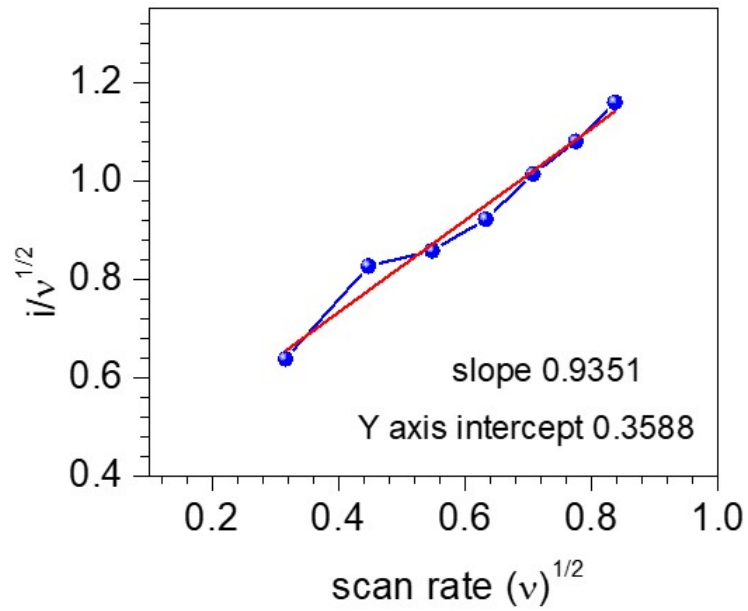

**Figure S4.** The plot of the  $v^{1/2}$  vs.  $i/v^{1/2}$  is plotted to estimate the  $k_1$  and  $k_2$  which are the slope of the curve and the y-axis intercept, respectively

**Table-1** Parameters obtained by fitting of Nyquist plot using Zfit software as a function of potential.

| <b>Sr.</b> | <b>Sample</b>                      | <b>Solution resistance</b>                    | <b>Charge-transferer</b>                                     | <b>Warburg impedance</b>                             |
|------------|------------------------------------|-----------------------------------------------|--------------------------------------------------------------|------------------------------------------------------|
| <b>No.</b> | <b>Name</b>                        | <b>(<math>R_s</math>-<math>\Omega</math>)</b> | <b>resistance (<math>R_{ct}</math>- <math>\Omega</math>)</b> | <b>(<math>W</math>-<math>\Omega.s^{-1/2}</math>)</b> |
| 1.         | Gd <sub>2</sub> NiMnO <sub>6</sub> | 22.0                                          | 68.5                                                         | 22                                                   |
| 2.         | Tb <sub>2</sub> NiMnO <sub>6</sub> | 5.2                                           | 31.5                                                         | 8.5                                                  |
